1 ***Stomatal responses at different vegetative stages of selected***  
2 ***maize varieties of Bangladesh under water deficit condition***

3 Md. Moin Uddin Talukder<sup>1</sup>, Pinky Debnath<sup>1</sup>, Sonia Nasrin<sup>2</sup>, Sonia Akter<sup>1</sup>, Md. Raihan Ali<sup>1</sup>, Md.

4 Rejaul Islam<sup>3</sup> and S M Abdul-Awal<sup>1\*</sup>

5 <sup>1</sup>Biotechnology & Genetic Engineering Discipline, Khulna University, Bangladesh.

6 <sup>2</sup>Soil, Water and Environment Discipline, Khulna University, Bangladesh.

7 <sup>3</sup>Agrotechnology Discipline, Khulna University, Bangladesh.

8

9 \*Corresponding author

10 E-mail: [smaa62@ku.ac.bd](mailto:smaa62@ku.ac.bd) (SMAA)

11

12

13

14

15

16

17

18

19

20

21

22

## 23 **Abstract**

24 Drought stress causes stomatal behavior change in most plants. Water deficit condition caused by  
25 drought is one of the most significant abiotic factors reducing plant growth, development,  
26 reproductive efficiency, and photosynthesis, resulting in yield loss. Maize (*Zea mays* L.) holds a  
27 superior position among all the cereals due to its versatile use in the food, feed, and alcohol  
28 industries. A common demonstrative feature of a complex network of signaling pathways led by  
29 predominantly abscisic acid under drought conditions is stomatal aperture reduction or stomatal  
30 closure, which allows the plant to reduce water loss through the stomatal pore and to sustain a long  
31 time on water deficit condition. This study analyses the stomatal density, stomatal closure  
32 percentages, and guard cell aperture reduction using a microscopy-based rapid & simple method  
33 to compare guard cell response & morphological variations of three hybrid maize varieties viz.  
34 BHM (BARI hybrid maize)-7, BHM-9, and BHM-13 developed by Bangladesh Agricultural  
35 Research Institute (BARI). A drought treatment was applied to all varieties at two different  
36 vegetative stages, vegetative stage 3 (V3) and V5, until they reach V4 and V6, respectively. After  
37 drought exposure at the V4 stage, the percentage of closed stomata of BHM-7, BHM-9, and BHM-  
38 13 was 21%, 23%, and 33%, respectively. The reduction in the guard cell aperture ratio of BHM-  
39 7, BHM-9, and BHM-13 was 14.83%, 10.92%, and 33.85%, respectively. At the V6 stage, for the  
40 second set of plants, the closed stomata of BHM-7, BHM-9, and BHM-13 were 18%, 21%, and  
41 34%, respectively. The rate of reduction in guard cell aperture ratio of BHM-7, BHM-9, and BHM-  
42 13 was 5.52%, 2.48%, and 38.75%, respectively. Therefore, BHM-13 showed maximum drought  
43 adaptation capacity compared to BHM-7 and BHM-9 due to the highest percentage of closed  
44 stomata and the highest percentage of reduction in aperture ratio.

45 **Keywords: Drought; stomatal aperture reduction; abscisic acid (ABA); vegetative stage.**

## 46 **Introduction**

47 Globally, drought is the most harmful environmental phenomenon that comes with financial  
48 hardship among farmers in developed countries, malnutrition, and even famine in third-world  
49 countries (1). It adversely affects almost every physiological process in the plant, such as  
50 membrane fluidity and function, decreases photosynthesis, causes injury, aberrant physiology,  
51 limitation of growth, and increases susceptibility to insects and disease-causing pests (2). Plants  
52 utilize various defense mechanisms to endure drought stress. Plants usually close their stomata in  
53 response to the environment. For instance, most plants close stomata at night, while plants may  
54 also close their stomata under severe conditions such as drought to limit the amount of water  
55 evaporation from their leaves. The opening and closing of stomata are a very well-regulated  
56 masterpiece of plant evolution driven by the translation of chemical signals into the mechanical  
57 movement of guard cells. Stomata are formed by two specialized guard cells, morphologically  
58 distinct from general epidermal cells (3). Guard cells surround stomata pores in the epidermis of  
59 plant leaves and stems. Stomata allow the diffusion of CO<sub>2</sub> into the leaf for photosynthesis and  
60 the diffusion of H<sub>2</sub>O out of the leaf during transpiration (4). Plants lose over 95% of their water  
61 content via transpiration to the atmosphere. Pairs of guard cells regulate this gaseous exchange.  
62 During water deficit conditions, water loss through transpiration is reduced in response to abscisic  
63 acid by promoting stomatal closure and inhibition of opening (5). Various environmental factors  
64 such as drought, CO<sub>2</sub> concentration, light, humidity, biotic stresses, and different plant hormones  
65 regulate stomatal apertures (6). These changes are driven by cation and anion effluxes. Opening  
66 or closure of stomata is achieved by osmotic swelling or shrinking of guard cells, respectively,  
67 driven by transmembrane ion fluxes of K<sup>+</sup>, Cl<sup>-</sup>, and malate<sup>2-</sup> (7). Reorganization of the  
68 cytoskeleton, metabolite production, posttranslational modifications of existing cellular proteins,

69 and modulation of gene expression are critical components of guard cell biology and determinants  
70 of stomatal regulation (8). Various major hormones are involved in stomatal regulation. Among  
71 these, ABA plays the overriding role (9). Increased level of ABA concentrations induces multiple  
72 cascades of biochemical events like protein phosphorylation, generation of nitric oxide (NO) and  
73 hydrogen peroxide (H<sub>2</sub>O<sub>2</sub>), changes in intracellular Ca<sup>2+</sup> concentration, and membrane  
74 depolarization (10), leading to the modifications in the activity of ion channels, decrease of the  
75 osmotic pressure in guard cells and, thereby, closure of stomata (6).

76 Other phytohormones, namely ethylene, jasmonates, and salicylic acid, also function in  
77 modulating stomatal aperture. Signaling pathways triggered by hormones and pathogen attacks  
78 often involve the generation of second messengers like NO and H<sub>2</sub>O<sub>2</sub> (11). H<sub>2</sub>O<sub>2</sub> has a marked  
79 effect on stomatal aperture. H<sub>2</sub>O<sub>2</sub> can induce stomatal closure and inhibit stomatal opening  
80 without any damage to cells (12). Histidine kinase AHK5 is involved in one pathway by which  
81 H<sub>2</sub>O<sub>2</sub>, derived from endogenous and environmental stimuli, is sensed and transduced to affect  
82 stomatal closure (13). Arabidopsis mutants lacking AHK5 show reduced stomatal closure in  
83 response to H<sub>2</sub>O<sub>2</sub>, which is reversed by complementation with the wild-type gene. Auxin regulates  
84 stomatal opening positively, although it can also inhibit stomatal opening when applied  
85 exogenously at high concentrations. Auxin promotes the activation of plasma membrane-localized  
86 H<sup>+</sup>-ATPases, leading to a hyperpolarization of the membrane. Activation of the K<sup>+</sup>-channels  
87 mediates an influx of potassium ions, followed by the stomata's opening. Here, we apply a  
88 microscopy-based technique to compare the percentage of close stomata and reduction in aperture  
89 ratio among the three maize varieties under water deficit conditions. BHM-13 showed the highest  
90 percentage of closed stomata and reduced aperture ratio compared to the other two varieties (BHM-

91 7 and BHM-9), indicating that BHM-13 has a high water utilization capacity during drought  
92 condition by reducing excess water loss.

93

94

95

96

97

98

99

100

101

102

103

104

105

106

107

108

109

110

111

112

113

## 114 **Materials & Methods**

### 115 **Seed germination and plant growing**

116 Seeds of three different varieties (BHM-7, BHM-9, and BHM-13) were transferred to the Petri  
117 dish containing blotting paper. The Petri dishes were placed in the growth chamber (Temperature:  
118  $25 \pm 1^\circ\text{C}$ , Humidity: 65%, Light: 2000 lux, Photoperiod: 12-hour light: 12-hour dark) for five days.  
119 Water was sprayed on the petri dish once a day for germination. Germinated seeds of each variety  
120 were transferred into the plastic bag containing soil and fertilizers. Soil was prepared & mixed  
121 with fertilizers like TSP, MOP, Gypsum, according to Hand Book of Agricultural Technology by  
122 Bangladesh Agricultural Research Council (14). An equal amount of soil-containing fertilizers  
123 was taken into the plastic bag. Germinated seeds were transferred into each plastic bag.

124

### 125 **Drought experiment**

126 After sowing germinated seeds into the plastic bag, regular watering was provided to each bag  
127 manually once a day to allow the seeds to grow until vegetative stage 3 (V3) and vegetative stage  
128 5 (V5). Water was sprayed once a day to half of the plants from both stages (V3 and V5; control  
129 plants), and the other half of the plants from both stages (V3 and V5) were kept without water  
130 (treated plants) until they reached V4 and V6 stage, respectively. After drought exposure, both  
131 control and treated plants received water until they reached at V5 and V7 stages.

132

### 133 **Isolation of epidermal peel**

134 A simple, cost-effective method was developed to isolate epidermal peel without using safranin  
135 and glycerol solution. A scissor was used to slightly cut the plant's abaxial surface of the second

136 leaf of the plant. Sharp forceps were used to take off a small portion of the leaf epidermal peel  
137 (<0.5 cm) as stomata are located in this area. The leaf epidermis was placed in a glass slide and a  
138 drop of water was added to the epidermis. The glass slide was then covered by a coverslip.  
139 Epidermal peel was collected at V3 and V5 stage just before drought exposure, at V4 and V6 stage  
140 just after drought exposure, and at V5 and V7 stage after re-watering of both control and treated  
141 plants.

142

### 143 **Stomatal density measurement**

144 Stomata were detected in the epidermal peel using Carl Zeiss Microscope affiliated with Zen Blue  
145 2.0 software and counted per mm<sup>2</sup> by ImageJ software. Stomata of three leaves of each variety  
146 were chosen randomly. Stomatal closure was calculated, and the final stomata open and closure  
147 percentage were determined with respect to the total stomata number per mm<sup>2</sup>.

148

### 149 **Stomatal closure and open percentage measurement**

150 A specific area was measured by ImageJ software by using the scaling of the Zen Blue 2.0  
151 software. Then the number of close and open stomata was counted on that area. After that, the  
152 probable total number of closed and open stomata was estimated mathematically in mm<sup>2</sup> of leaf  
153 area.

154

### 155 **Measurement of guard cell aperture**

156 The guard cell aperture ratio was counted by the width/length method described by Russell  
157 Johnson (15). Open stomata will have width/length values of 0.29 or more, partially open stomata

158 will have 0.18 to less than 0.29, and fully closed stomata will have 0. Specific numbers of stomata  
159 were taken randomly per mm<sup>2</sup> to measure the guard cell aperture ratio in the second leaf of plants  
160 in each variety at different vegetative stages.

161

## 162 **Revival capacity measurement**

163 The stomatal ratio was measured for the control (regularly watered) and treated group (drought  
164 treated followed by re-watering). Then a comparison was conducted to deduce which variety has  
165 the lowest aperture ratio difference between the control and treated groups. Variety with the lowest  
166 aperture ratio difference has the best revival capacity because they are close to the standard plant  
167 (control group).

168

## 169 **Statistical Analysis**

170 Data were analyzed using GraphPad Prism 8.0 software. The student's t-test was used to compare  
171 different stages of two groups & One-way ANOVA with Tukey-Kramer post-test was used for  
172 multiple comparisons.

173

174

175

176

177

178



## 179 **Results**

### 180 **Stomatal density among the varieties**

181 Before drought stage at V3 stage, BHM-7, BHM-9, and BHM-13 had a stomatal number of  $206 \pm$   
182  $2.18$  (mean  $\pm$  SE),  $198 \pm 2.02$  (mean  $\pm$  SE), and  $208 \pm 1.15$  (mean  $\pm$  SE), respectively (Fig. 1A)  
183 whereas, at V5 stage, BHM-7, BHM-9, and BHM-13 had a stomatal number of  $334 \pm 1.73$  (mean  
184  $\pm$  SE),  $319 \pm 8.02$  (mean  $\pm$  SE), and  $345 \pm 6.57$  (mean  $\pm$  SE), respectively (Fig. 1B). After drought  
185 exposure at the V4 stage, the stomatal number of BHM-7, BHM-9, and BHM-13 was  $336 \pm 4.163$   
186 (mean  $\pm$  SE),  $308 \pm 6.009$  (mean  $\pm$  SE), and  $340 \pm 4.163$  (mean  $\pm$  SE), respectively (Fig. 1C)  
187 whereas, at V6 stage, the stomatal number of BHM-7, BHM-9, and BHM-13 was  $357 \pm 3.756$   
188 (mean  $\pm$  SE),  $314 \pm 2.728$  (mean  $\pm$  SE),  $321 \pm 13.58$  (mean  $\pm$  SE), respectively (Fig. 1D). After  
189 re-watering at the V5 stage, the stomatal number of BHM-7, BHM-9, and BHM-13 was  $362 \pm$   
190  $18.78$  (mean  $\pm$  SE),  $364 \pm 67.59$  (mean  $\pm$  SE), and  $338 \pm 24.79$  (mean  $\pm$  SE), respectively (Fig.  
191 1E) whereas, at V7 stage, the stomatal number of BHM-7, BHM-9, and BHM-13 was  $278 \pm 5.364$   
192 (mean  $\pm$  SE),  $326 \pm 3.055$  (mean  $\pm$  SE), and  $356 \pm 2.963$  (mean  $\pm$  SE), respectively (Fig. 1F).

193

194

195

196

197

198

199

200

201 **Fig 1. The number of stomata at two different vegetative stages of maize varieties.** A. Stomatal  
202 number of BHM-7, BHM-9, BHM-13 at V3 stage before drought exposure. B. Stomatal number  
203 of BHM-7, BHM-9, BHM-13 at V5 stage before drought exposure. C. Stomatal number of BHM-  
204 7, BHM-9, BHM-13 at V4 stage after drought exposure. D. Stomatal number of BHM-7, BHM-  
205 9, BHM-13 at V6 stage after drought exposure. E. Stomatal number of BHM-7, BHM-9, BHM-13  
206 at V5 stage after re-watering. F. Stomatal number of BHM-7, BHM-9, BHM-13 at V7 stage after  
207 re-watering. A specific area in the second leaf of each variety was randomly selected, and the  
208 number of stomata was counted in this area (S1 Fig.). Data are presented as a mean of three  
209 biological replicates, and error bars represent the standard error of the mean.

210

211

212

213

214

215

216

217

218

219

220 **Stomatal closure percentages among the varieties at the V4 stage**

221 **after drought treatment**

222 After drought treatment at the V4 stage, the percentage of stomatal closure of BHM-7 was 11%  
223 and 21% for control and treated plants, respectively (Fig. 2A). The rate of stomatal closure of  
224 BHM-9 was 6% and 23% for control and treated plants, respectively (Fig. 2B). Furthermore, in  
225 BHM-13, the stomatal closure percentage was 11% and 33% for control and treated plants,  
226 respectively (Fig. 2C). Therefore, the highest rate of stomatal closure was found in the BHM-13  
227 variety compared to BHM-7 and BHM-9 (Fig. 2D).

228

229

230

231

232

233

234

235

236

237

238

239

240

241

242 **Fig 2. Stomatal closure and open percentage in BHM-7, BHM-9, BHM-13 at V4 stage after**  
243 **drought exposure.** A. Stomatal closure and open percentage after drought exposure at V4 stage  
244 in BHM-7. B. Stomatal closure and open percentage after drought exposure at V4 stage in BHM-  
245 9. C. Stomatal closure and open percentage after drought exposure at V4 stage in BHM-13. D.  
246 Comparison of stomatal closure percentage of BHM-7, BHM-9, and BHM-13 at V4 stage. A  
247 specific area in the second leaf of each variety was randomly selected, and the percentage of  
248 stomatal closure was calculated in this area. Data are presented as a mean of three biological  
249 replicates, and error bars represent standard error. One-way ANOVA analysis was performed.  
250 BHM-13 showed a significantly more significant percentage of closed stomata.

251

252

253

254

255

256

257

258

259

260

261

262

263

264 **Stomatal closure percentages among the varieties at the V6 stage**  
265 **after drought treatment**

266 After drought treatment at the V6 stage, the percentage of stomatal closure of BHM-7 was 14%  
267 and 18% for control and treated groups, respectively (Fig. 3A). While, for the control and treated  
268 group of BHM-9, the percentage of stomatal closure was 7% and 21%, respectively (Fig. 3B).  
269 BHM-13 had 0% and 34% closure percentages for control and treated groups, respectively (Fig.  
270 3C). Therefore, the highest rate of stomatal closure was also found in BHM-13 compared to BHM-  
271 7 and BHM-9 at the V6 stage (Fig. 3D).

272

273

274

275

276

277

278

279

280

281

282

283

284

285

286 **Fig 3. Stomatal closure and open percentage in BHM-7, BHM-9, BHM-13 at V6 stage after**  
287 **drought exposure.** A. Stomatal closure and open percentage of BHM-7 after drought exposure at  
288 V6 stage. B. Percentage of close and open stomata after drought exposure at V6 stage in BHM-9.  
289 C. Stomatal closure and open percentage after drought treatment at V6 stage in BHM-13. D.  
290 Comparison of the percentage of stomatal closure in BHM-7, BHM-9, and BHM-13 at V6 stage.  
291 Data are presented as three biological replicates, and error bars represent the standard error. One-  
292 way ANOVA analysis was performed. BHM-13 showed a significantly more percentage of closed  
293 stomata.

294

295

296

297

298

299

300

301

302

303

304

305

306

307

308 **Stomatal closure percentages among the varieties at V5 and V7 stage**  
309 **after re-watering**

310 After re-watering at the V5 stage, the percentages of stomatal closure of BHM-7 were 0% and 7%  
311 for control and treated groups, respectively (Fig. 4A). BHM-9 had stomatal closure percentages of  
312 0% and 15% for control and treated plants, respectively (Fig. 4B). All of the stomata were open in  
313 BHM-13 for both control and treated groups (Fig. 4C). Moreover, after re-watering at the V7 stage,  
314 all stomata were open for all varieties for both experimental and control plants (Fig. 4D-5F).

315

316

317

318

319

320

321

322

323

324

325

326

327

328

329

330 **Fig 4. Stomatal closure and open percentage in BHM-7, BHM-9, BHM-13 at V5 and V7 stage**  
331 **after re-watering.** A. Stomatal open & closure percentage after re-watering at V5 stage in BHM-7.  
332 B. Stomatal open & closure percentage after re-watering at V5 stage in BHM-9. C. Stomatal open  
333 & closure percentage after re-watering at V5 stage in BHM-13. D. Stomatal open & closure  
334 percentage after re-watering at V7 stage in BHM-7. E. Stomatal open & closure percentage after  
335 re-watering at V7 stage in BHM-9. F. Stomatal open & closure percentage after re-watering at V7  
336 stage in BHM-13. Data are presented as a mean of three biological replicates, and error bars  
337 represent standard error.

338

339

340

341

342

343

344

345

346

347

348



349 **Guard cell aperture ratio among the varieties at different vegetative**  
350 **stages in presence or absence of drought**

351 At V3 stage, before drought exposure the mean aperture ratio of BHM-7, BHM-9, BHM-13 was  
352  $0.051 \pm 0.005$  (Mean  $\pm$  SE),  $0.047 \pm 0.005$  (Mean  $\pm$  SE) and  $0.045 \pm 0.003$  (Mean  $\pm$  SE),  
353 respectively (Fig. 5A). At V5 stage, prior to drought exposure the mean aperture ratio of BHM-7,  
354 BHM-9, BHM-13 was  $0.073 \pm 0.008$  (Mean  $\pm$  SE),  $0.049 \pm 0.005$  (Mean  $\pm$  SE) and  $0.043 \pm 0.002$   
355 (Mean  $\pm$  SE), respectively (Fig. 5B).

356  
357 However, after drought exposure at the V4 stage, the mean aperture ratio of BHM-7 was  $0.046 \pm$   
358  $0.004$  (Mean  $\pm$  SE) and  $0.039 \pm 0.003$  (Mean  $\pm$  SE) for control and treated plants, respectively  
359 (Fig. 5C). The mean aperture ratio of BHM-9 was  $0.043 \pm 0.002$  (Mean  $\pm$  SE) and  $0.038 \pm 0.003$   
360 (Mean  $\pm$  SE) for the control and treated plants, respectively (Fig. 5C). The mean aperture ratio of  
361 BHM-13 was  $0.058 \pm 0.002$  (Mean  $\pm$  SE) and  $0.038 \pm 0.003$  (Mean  $\pm$  SE) for the control and  
362 treated plants, respectively (Fig. 5C). The mean aperture ratio of BHM-7 and BHM-9 for control  
363 and treated plants was not significantly differ each other ( $p > 0.05$ ; students' t-test), however, a  
364 statistically significant difference was found in the BHM-13 control and treated plants  
365 ( $p = 0.002 < 0.05$ ; students' t-test). Percentages of aperture decrease were 14.83%, 10.92%, and  
366 33.85% in BHM-7, BHM-9, and BHM-13, respectively, upon drought treatment compared to their  
367 control groups.

368  
369 At the V6 stage after 7 days of drought treatment, the mean aperture ratio of BHM-7 was  $0.054 \pm$   
370  $0.009$  (Mean  $\pm$  SE), and  $0.051 \pm 0.004$  (Mean  $\pm$  SE) for control and drought treated plants,  
371 respectively (Fig. 5D). In BHM-9, the mean aperture ratio was  $0.060 \pm 0.007$  (Mean  $\pm$  SE), and

372 0.058 ± 0.006 (Mean ± SE) for control and drought treated plants, respectively (Fig. 5D). Whereas  
373 in BHM-13 control and drought treated plants, the mean aperture ratio was 0.057± 0.005 (Mean ±  
374 SE) and 0.035 ± 0.002 (Mean ± SE), respectively (Fig. 5D). The mean aperture ratio of BHM-7  
375 and BHM-9 for control and treated plants was not significantly differ each other (p=>0.05;  
376 students' t-test), however, a statistically significant difference was found in the BHM-13 control  
377 and treated plants (p=0.008<0.05; students' t-test). The percentage of aperture reduction in BHM-  
378 7, BHM-9, and BHM-13 was 5.52%, 2.48%, and 38.75 %, respectively, upon drought treatment  
379 compared to control groups.

380

381

382

383

384

385

386

387

388

389

390

391

392

393

394 **Fig 5. Width/Length ratio of guard cell of BHM-7, BHM-9, and BHM-13.** A. Guard cell  
395 aperture ratio of BHM-7, BHM-9, and BHM-13 at V3 stage before the drought. B. Guard cell  
396 aperture ratio of BHM-7, BHM-9, and BHM-13 at V5 stage before the drought. C. Guard cell  
397 aperture ratio of BHM-7, BHM-9, and BHM-13 at V4 stage after drought treatment. D. Guard cell  
398 aperture ratio of BHM-7, BHM-9, and BHM-13 at V6 stage after drought treatment. A specific  
399 area in the second leaf of each variety was randomly selected, and guard cell aperture ratio was  
400 calculated according to Johnson R (2007) (S2 Fig.). Data are presented as a mean of three  
401 biological replicates, and error bars represent standard error.

402

403

404

405

406

407

408

409

410

411

412

413

414

415

416

## 417 **Guard cell aperture ratio among the varieties after re-watering**

418 After re-watering at the V5 stage, the mean aperture ratio of BHM-7 was  $0.060 \pm 0.0080$  (Mean  $\pm$   
419 SE) and  $0.050 \pm 0.005$  (Mean  $\pm$  SE) for control and treated plant groups, respectively (Fig. 6A).  
420 The mean aperture ratio of BHM-9 was  $0.0612 \pm 0.006$  (Mean  $\pm$  SE) and  $0.057 \pm 0.006$  (Mean  $\pm$   
421 SE) for the control and treated plants, respectively (Fig. 6A). The mean aperture ratio of BHM-13  
422 was  $0.056 \pm 0.005$  (Mean  $\pm$  SE) and  $0.054 \pm 0.008$  (Mean  $\pm$  SE) for control and treated plant group,  
423 respectively (Fig. 6A). After re-watering, the differences between the aperture ratio of BHM-7  
424 control and treated, BHM-9 control and treated, BHM-13 control and treated were 16.42%, 5.32%,  
425 and 3.27%, respectively.

426  
427 After re-watering at the V7 stage, the mean aperture ratio of BHM-7 was  $0.078 \pm 0.0079$  (Mean  $\pm$   
428 SE) and  $0.065 \pm 0.007$  (Mean  $\pm$  SE) for the control and treated groups, respectively (Fig. 6B). The  
429 mean aperture ratio of BHM-9 was  $0.0612 \pm 0.006$  (Mean  $\pm$  SE) and  $0.058 \pm 0.006$  (Mean  $\pm$  SE) for  
430 the control and treated groups, respectively (Fig. 6B). The mean aperture ratio of BHM-13 was  
431  $0.0561 \pm 0.0058$  (Mean  $\pm$  SE) and  $0.0550 \pm 0.0078$  (Mean  $\pm$  SE) for the control and treated groups,  
432 respectively (Fig. 6B). After re-watering, the differences between aperture ratio of BHM-7 control  
433 and treated, BHM-9 control and treated, BHM-13 control and treated were 16.50%, 27.74%, and  
434 4.03%, respectively. Both at V5 and V7 stage, BHM-13 showed the lowest percentages of aperture  
435 ratio compared to BHM-7 and BHM-9 indicating that BHM-13 has high water use efficiency  
436 compared to other varieties.

437

438

439

440 **Fig 6. Width/Length ratio of guard cells of BHM-7, BHM-9, and BHM-13 after re-watering.**

441 A. Guard cell aperture ratio of BHM-7, BHM-9, and BHM-13 at V5 stage after re-watering. B.

442 Guard cell aperture ratio of BHM-7, BHM-9, and BHM-13 at V7 stage after re-watering. Data are

443 presented as a mean of three biological replicates, and error bars represent standard error.

444

445

446

447

448

449

450

451

452

453

454

455

456

457

458

459

460

461

462

## 463 **Discussion**

### 464 **The stomatal number varies at different vegetative stages**

465 The stomatal density of BHM-7, BHM-9 and BHM-13 varies each other with the age of plants and  
466 treatment condition (Fig. 1). Stomatal density was increased in all plants in V4 and V5 stage (Fig.  
467 1C and Fig. 1E) compared to V3 (Fig. 1A). However, stomatal density was decreased in BHM-7  
468 at V7 stage (Fig. 1F) compared to V5 (Fig. 1B) and V6 stage (Fig. 1D). Drought has a strong  
469 influence in stomatal density, guard cell size and aperture ratio. It has been found that severe  
470 drought can lead to a reduction in stomatal number, though an increase in stomatal number is  
471 possible under low or moderate drought conditions (16). The responses of guard cell size and  
472 stomatal number to environmental variables depend on a time scale from milliseconds to millions  
473 of years (17). The physiological mechanisms of stomatal response are very complex and not yet  
474 fully understood to date (18, 19).

475

### 476 **BHM-13 showed the highest stomatal closure and lowest aperture** 477 **ratio in both vegetative stages under drought exposure**

478 After 7 days' drought treatment, BHM-13 showed highest percentage of closed stomata compared  
479 to BHM-7 and BHM-9 both at the V4 stage (Fig. 2C) and at the V6 stage (Fig. 3C). By synthesizing  
480 abscisic acid, it effectively reduces water loss in drought conditions than the other two varieties  
481 regarding stomata closing phenomena (20). After re-watering for 7 days, no stomata were closed  
482 in BHM-13 (Fig. 4C), however, BHM-7 and BHM-9 had 7% and 15% closed stomata, respectively  
483 at V5 stage (Fig. 4A and Fig. 4B). This was due to a physiologically younger form of leaves of  
484 stressed plants following turgor regaining (21). During endosmosis or the entry of water, stomata

485 became turgid, which resulted in stomatal opening. When the turgor develops within the two guard  
486 cells, the thin outer walls bulge outward and force the inner walls into a crescent shape to open the  
487 stomata. This is the state during which the exchange of oxygen, carbon dioxide, and water vapor  
488 loss occurred through pores (3, 22).

489 At the V3 stage and V5 stage, before the drought, BHM-13 had the lowest aperture ratio (Fig. 5A  
490 and 5B). After drought exposure at V4 and V6 stage, a highest reduction of the aperture ratio was  
491 found in BHM-13 treated plants compared to control plants (Fig. 5C and 5D). This is probably due  
492 to the production of high abscisic acid in the treated plants under water deficit condition, that  
493 subsequently leads to a reduction of the aperture between guard cells (20). A similar aperture ration  
494 was found in control and treated plants, both for BHM-7 and BHM-9 (Fig. 5C and 5D). After  
495 drought exposure followed by re-watering, the aperture ratio of the treated group was very close  
496 to the control group for BHM-13 (Fig. 6A and 6B). However, the aperture ratio is varied for the  
497 control and treated plants, both for the BHM-7 and BHM-9 (Fig. 6A and 6B). Plants' abiotic stress  
498 adaptation mechanisms are very complex; however, abscisic acid is the crucial regulator of  
499 adaptation mechanisms (23).

500 Therefore, BHM-13 is the most drought-resistant variety amongst the three tested varieties (BHM-  
501 7, BHM-9, and BHM-13). It has been found that BHM-13 is morphologically short and capable  
502 of developing side branching from its lower nodes under heat stress condition (24). Since drought-  
503 resistant plants should combine a better root system, stomatal regulation, water-use efficiency, and  
504 hormonal balance, further morphological, biochemical & yield analyses are recommended to find  
505 out the drought-resistant variety more precisely.

506

507

## 508 **Acknowledgments**

509 We thank Biotechnology and Genetic Engineering Discipline and Agrotechnology Discipline,  
510 Khulna University for their institutional and technical support.

511

## 512 **Author Contributions**

513 Conceived and designed the experiment: SMAA. Performed the experiment: MMUT, PD.  
514 Analyzed the data: SN, MRA. Contributed to instrumental and analytical tools: MRA, MRI. Wrote  
515 the original draft of Manuscript: MMUT, SA, SN. Review and editing of the draft of the  
516 Manuscript: SMAA.

517

518

519

520

521

522

523

524

525

526

527

528

529



## 530 **References**

- 531 1. Passioura J. The drought environment: physical, biological and agricultural perspectives.  
532 *Journal of Experimental Botany*. 2007; 58(2): 113-7.
- 533 2. Jaleel CA, Manivannan P, Wahid A, Farooq M, Al-Juburi HJ, Somasundaram R, et al.  
534 Drought stress in plants: a review on morphological characteristics and pigments composition.  
535 *International Journal of Agriculture and Biology*. 2009; 11(1): 100-5.
- 536 3. Franks PJ, Farquhar GD. The mechanical diversity of stomata and its significance in gas-  
537 exchange control. *Plant Physiology*. 2007; 143(1): 78-87.
- 538 4. Negi J, Hashimoto-Sugimoto M, Kusumi K, Iba K. New approaches to the biology of  
539 stomatal guard cells. *Plant Cell Physiol*. 2014; 55(2): 241-50.
- 540 5. Mittelheuser CJ, Van Steveninck RFM. Stomatal Closure and Inhibition of Transpiration  
541 induced by (RS)-Abscisic Acid. *Nature*. 1969; 221(5177): 281-2.
- 542 6. Acharya BR, Assmann SM. Hormone interactions in stomatal function. *Plant Molecular*  
543 *Biology*. 2009; 69(4): 451-62.
- 544 7. Fan LM, Zhao Z, Assmann SM. Guard cells: a dynamic signaling model. *Current Opinion*  
545 *in Plant Biology*. 2004; 7(5): 537-46.
- 546 8. Cominelli E, Galbiati M, Vavasseur A, Conti L, Sala T, Vuylsteke M, et al. A guard-cell-  
547 specific MYB transcription factor regulates stomatal movements and plant drought tolerance.  
548 *Current biology*. 2005; 15(13): 1196-1200.
- 549 9. Munemasa S, Hauser F, Park J, Waadt R, Brandt B, Schroeder JI. Mechanisms of abscisic  
550 acid-mediated control of stomatal aperture. *Current Opinion in Plant Biology*. 2015; 28: 154-62.

- 551 10. Lind C, Dreyer I, López-Sanjurjo EJ, Meyer KV, Ishizaki K, Kohchi T, et al. Stomatal  
552 guard cells co-opted an ancient ABA-dependent desiccation survival system to regulate stomatal  
553 closure. *Current Biology*. 2015; 25(7): 928-35.
- 554 11. Eisele JF, Fäßler F, Bürgel PF, Chaban C. A Rapid and Simple Method for Microscopy-  
555 Based Stomata Analyses. *PLOS One*. 2016; 11(10): e0164576.
- 556 12. Zhang X, Dong FC, Gao JF, Song CP. Hydrogen peroxide-induced changes in intracellular  
557 pH of guard cells precede stomatal closure. *Cell Research*. 2001; 11(1): 37-43.
- 558 13. Desikan R, Horák J, Chaban C, Mira-Rodado V, Witthöft J, Elgass K, et al. The Histidine  
559 Kinase AHK5 Integrates Endogenous and Environmental Signals in Arabidopsis Guard Cells.  
560 *PLOS One*. 2008; 3(6): e2491.
- 561 14. Chowdhury MAH, Hassan DMS. *Hand Book of Agricultural Technology*. Bangladesh  
562 Agricultural Research Council, Farmgate, Dhaka. 2013; 230p.
- 563 15. Johnson R. Control of Leaf Stomatal Opening: PLANT STOMATA ENCYCLOPEDIA.  
564 in Colby J. *Res. Meth*. 2007; 9: 14-17 [[https://plantstomata.wordpress.com/2018/01/07/control-of-  
565 leaf-stomatal-opening/](https://plantstomata.wordpress.com/2018/01/07/control-of-leaf-stomatal-opening/)]
- 566 16. Xu Z, Zhou G. Responses of leaf stomatal density to water status and its relationship with  
567 photosynthesis in a grass. *Journal of Experimental Botany*. 2008; 59(12): 3317-25.
- 568 17. Assmann SM, Wang XQ. From milliseconds to millions of years: guard cells and  
569 environmental responses. *Current Opinion in Plant Biology*. 2001; 4(5): 421-8.
- 570 18. Sousa T, Oliveria MT, Pereira JM. Physiological Indicators of Plant Water Status of  
571 Irrigated and Non-irrigated Grapevines Grown in a Low Rainfall Area of Portugal. *Plant and Soil*.  
572 2006; 282(1-2): 127-34.

- 573 19. Gudesblat GE, Iusem ND, Morris PC. Guard cell-specific inhibition of Arabidopsis MPK3  
574 expression causes abnormal stomatal responses to abscisic acid and hydrogen peroxide. *New*  
575 *Phytologist*. 2007; 173(4): 713-21.
- 576 20. Schroeder JI, Kwak JM, Allen GJ. Guard cell abscisic acid signalling and engineering  
577 drought hardiness in plants. *Nature*. 2001; 410(6826): 327-30.
- 578 21. Fischer RA. After-effect of water stress on stomatal opening potential: II. Possible causes.  
579 *Journal of Experimental Botany*. 1970; 21(2): 386-404.
- 580 22. Lawson T, Blatt MR. Stomatal size, speed, and responsiveness impact on photosynthesis  
581 and water use efficiency. *Plant physiology*. 2014; 164(4): 1556-70.
- 582 23. Xiong L, Zhu JK. Regulation of abscisic acid biosynthesis. *Plant physiology*. 2003; 133(1):  
583 29-36.
- 584 24. Biswas SC. On Farm Demonstration Trial of Heat Tolerant Maize for Asian Countries  
585 (HTMA) & White Maize. BRAC Agricultural Research & Development Centre, BRRI, Joydebpur,  
586 Gazipur, Bangladesh. 2019.
- 587
- 588
- 589
- 590
- 591
- 592
- 593
- 594
- 595

596 **Supporting Information**

597 **S1 Fig. Stomatal counting of leaf epidermal peel.**

598 **S2 Fig. Measurement of guard cell aperture ratio.**

599

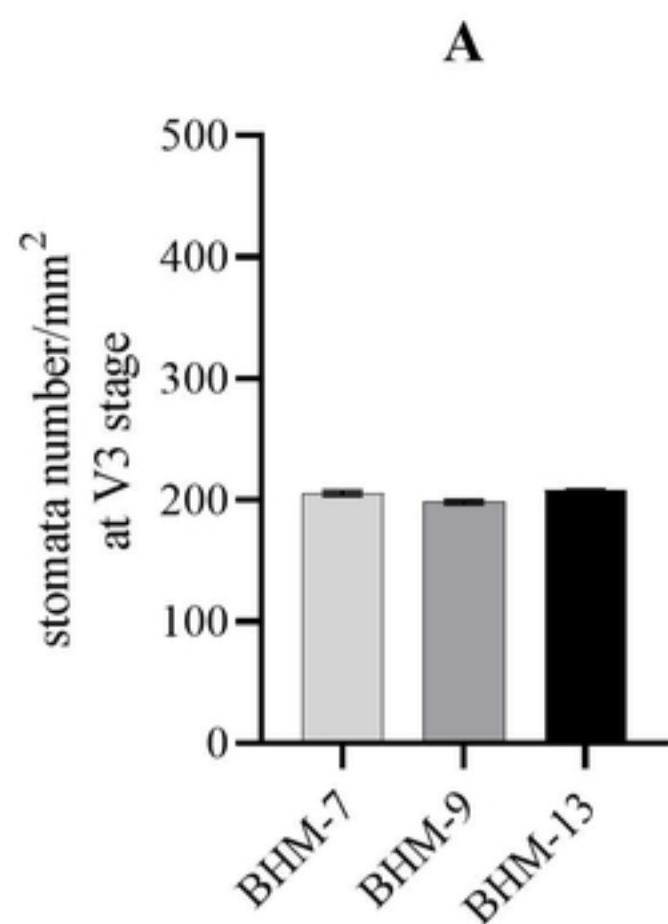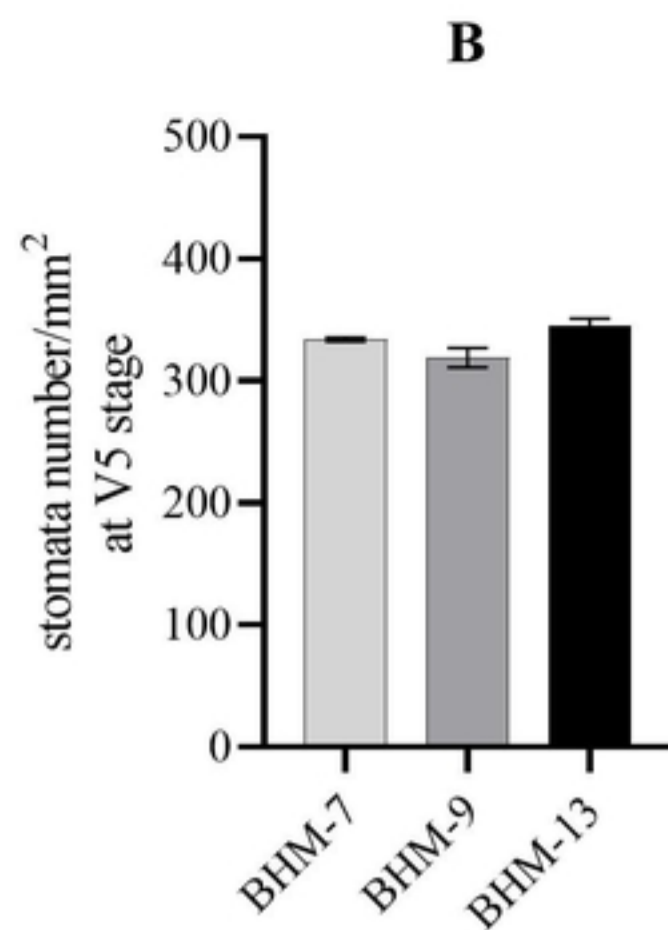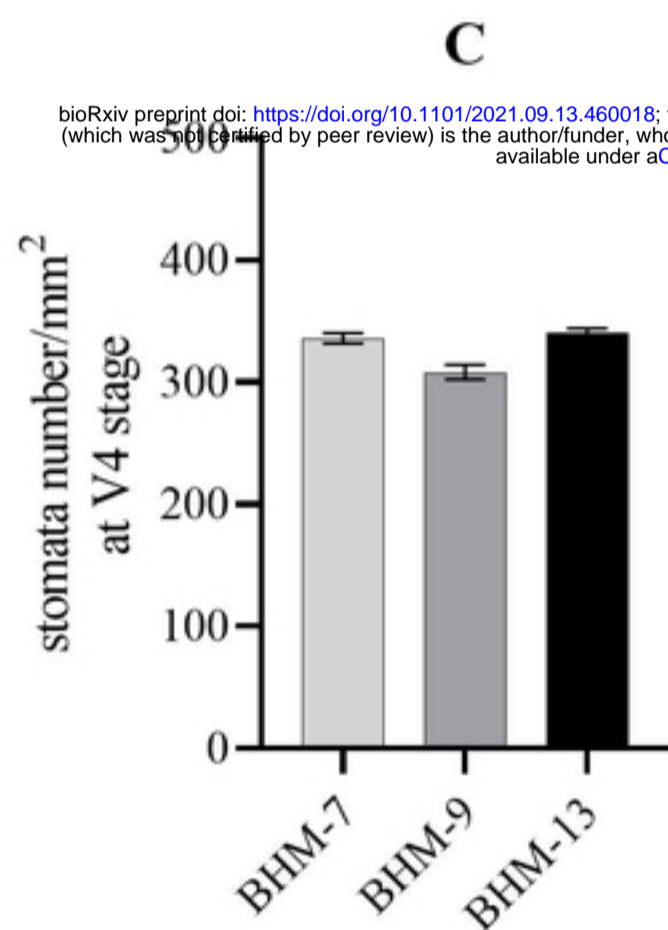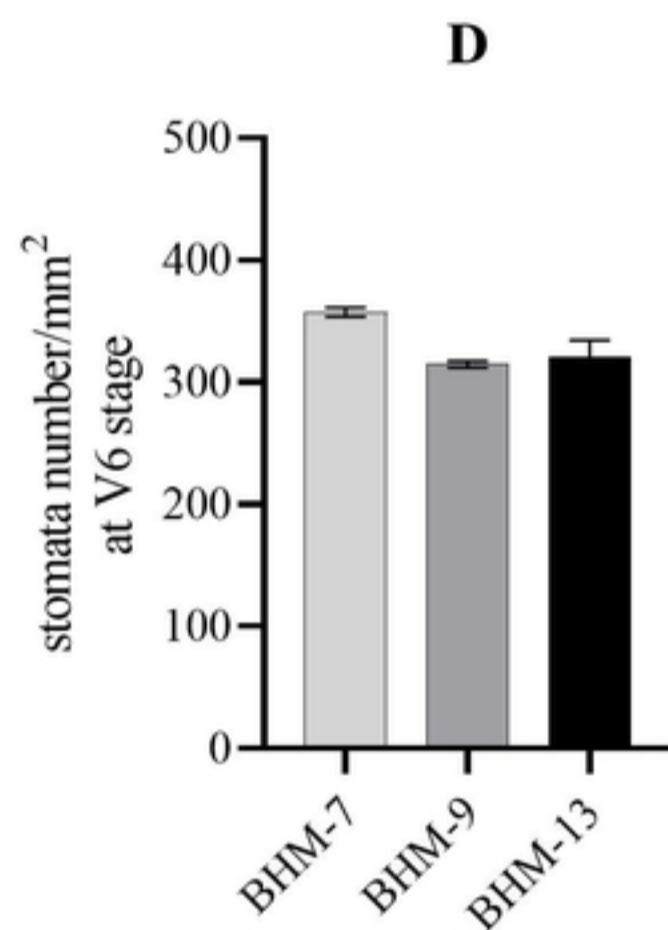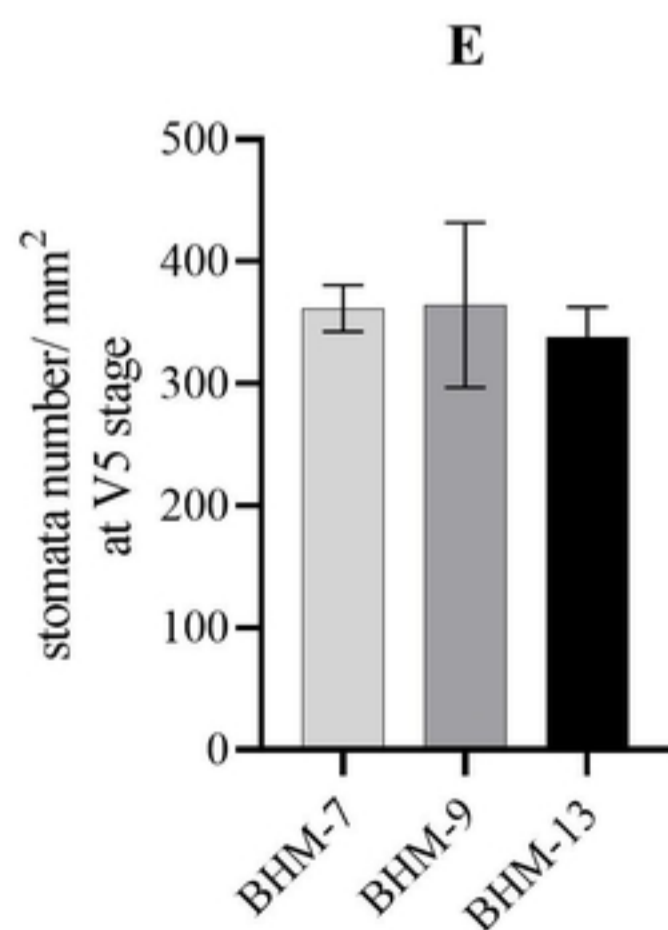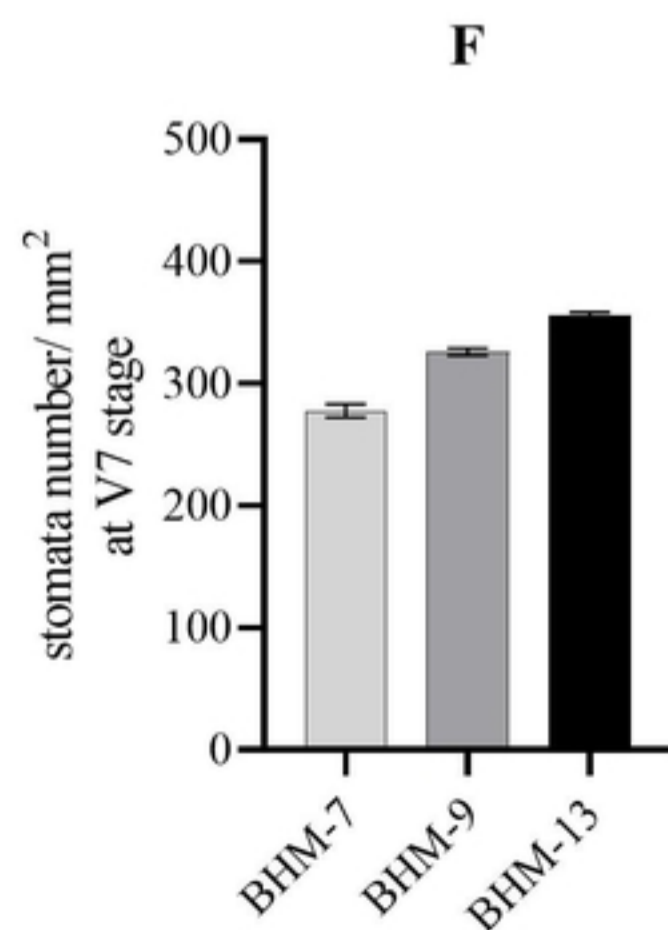

bioRxiv preprint doi: <https://doi.org/10.1101/2021.09.13.460018>; this version posted September 13, 2021. The copyright holder for this preprint (which was not certified by peer review) is the author/funder, who has granted bioRxiv a license to display the preprint in perpetuity. It is made available under aCC-BY 4.0 International license.

Figure 1

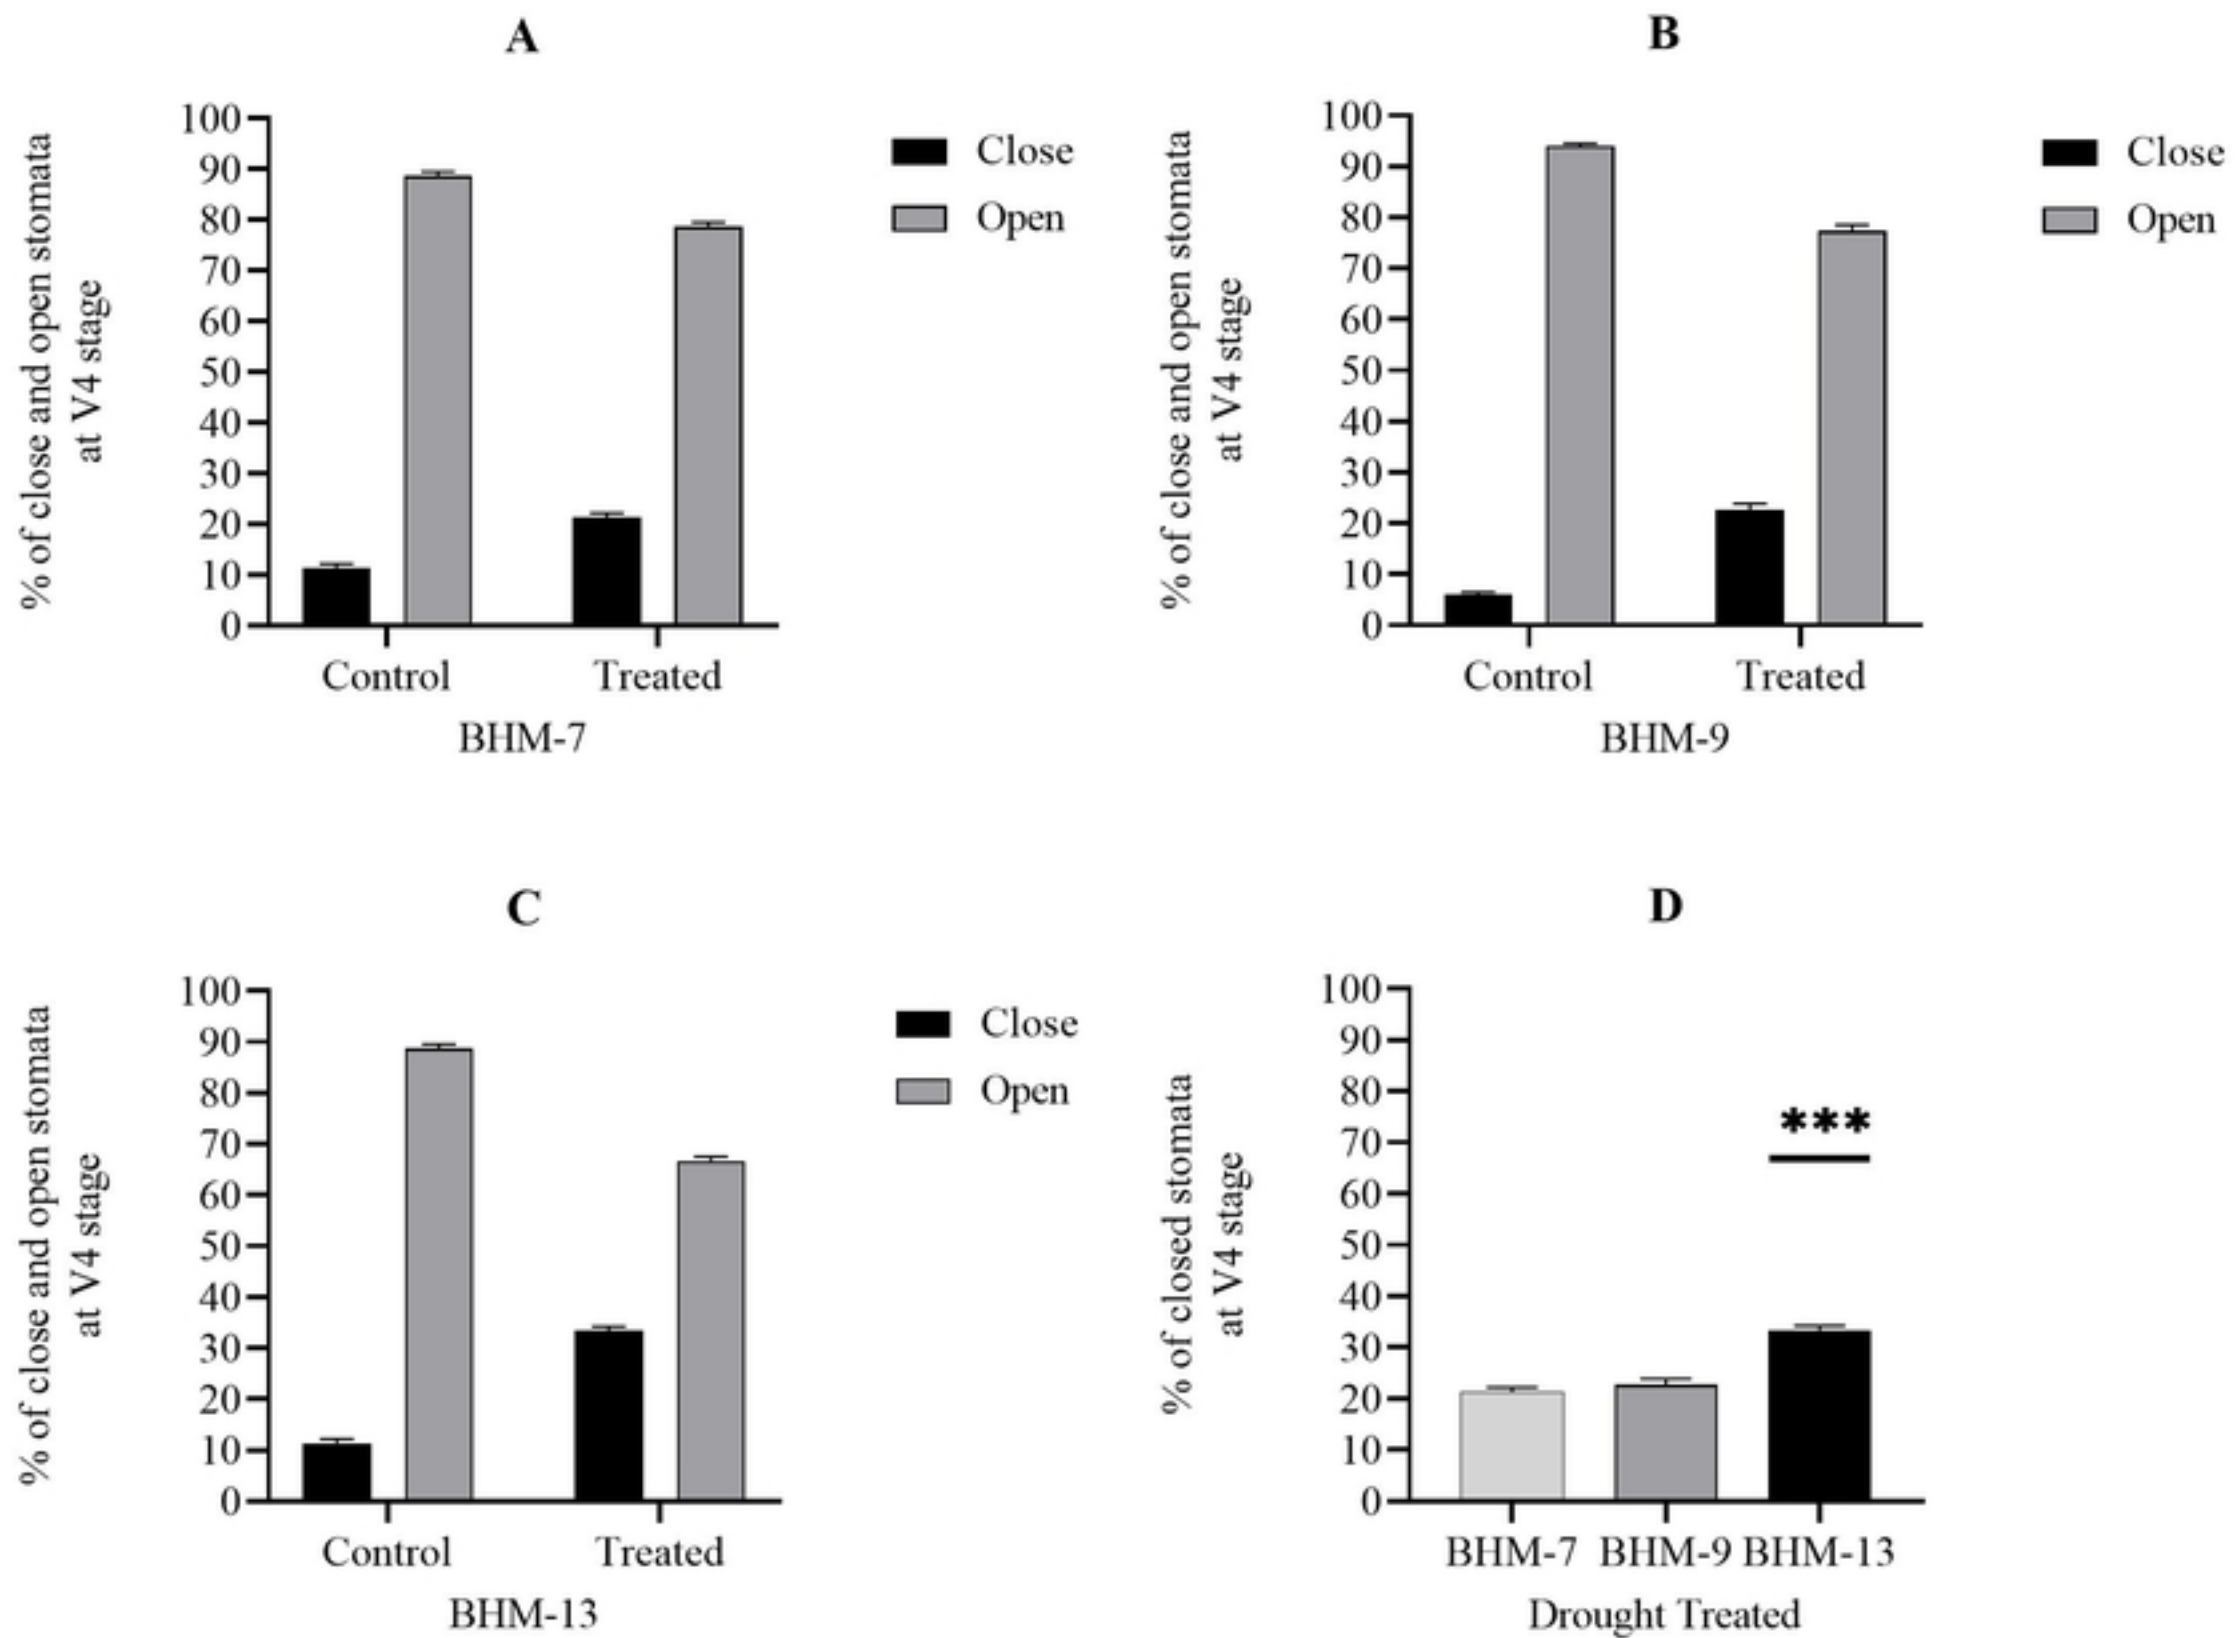

Figure 2

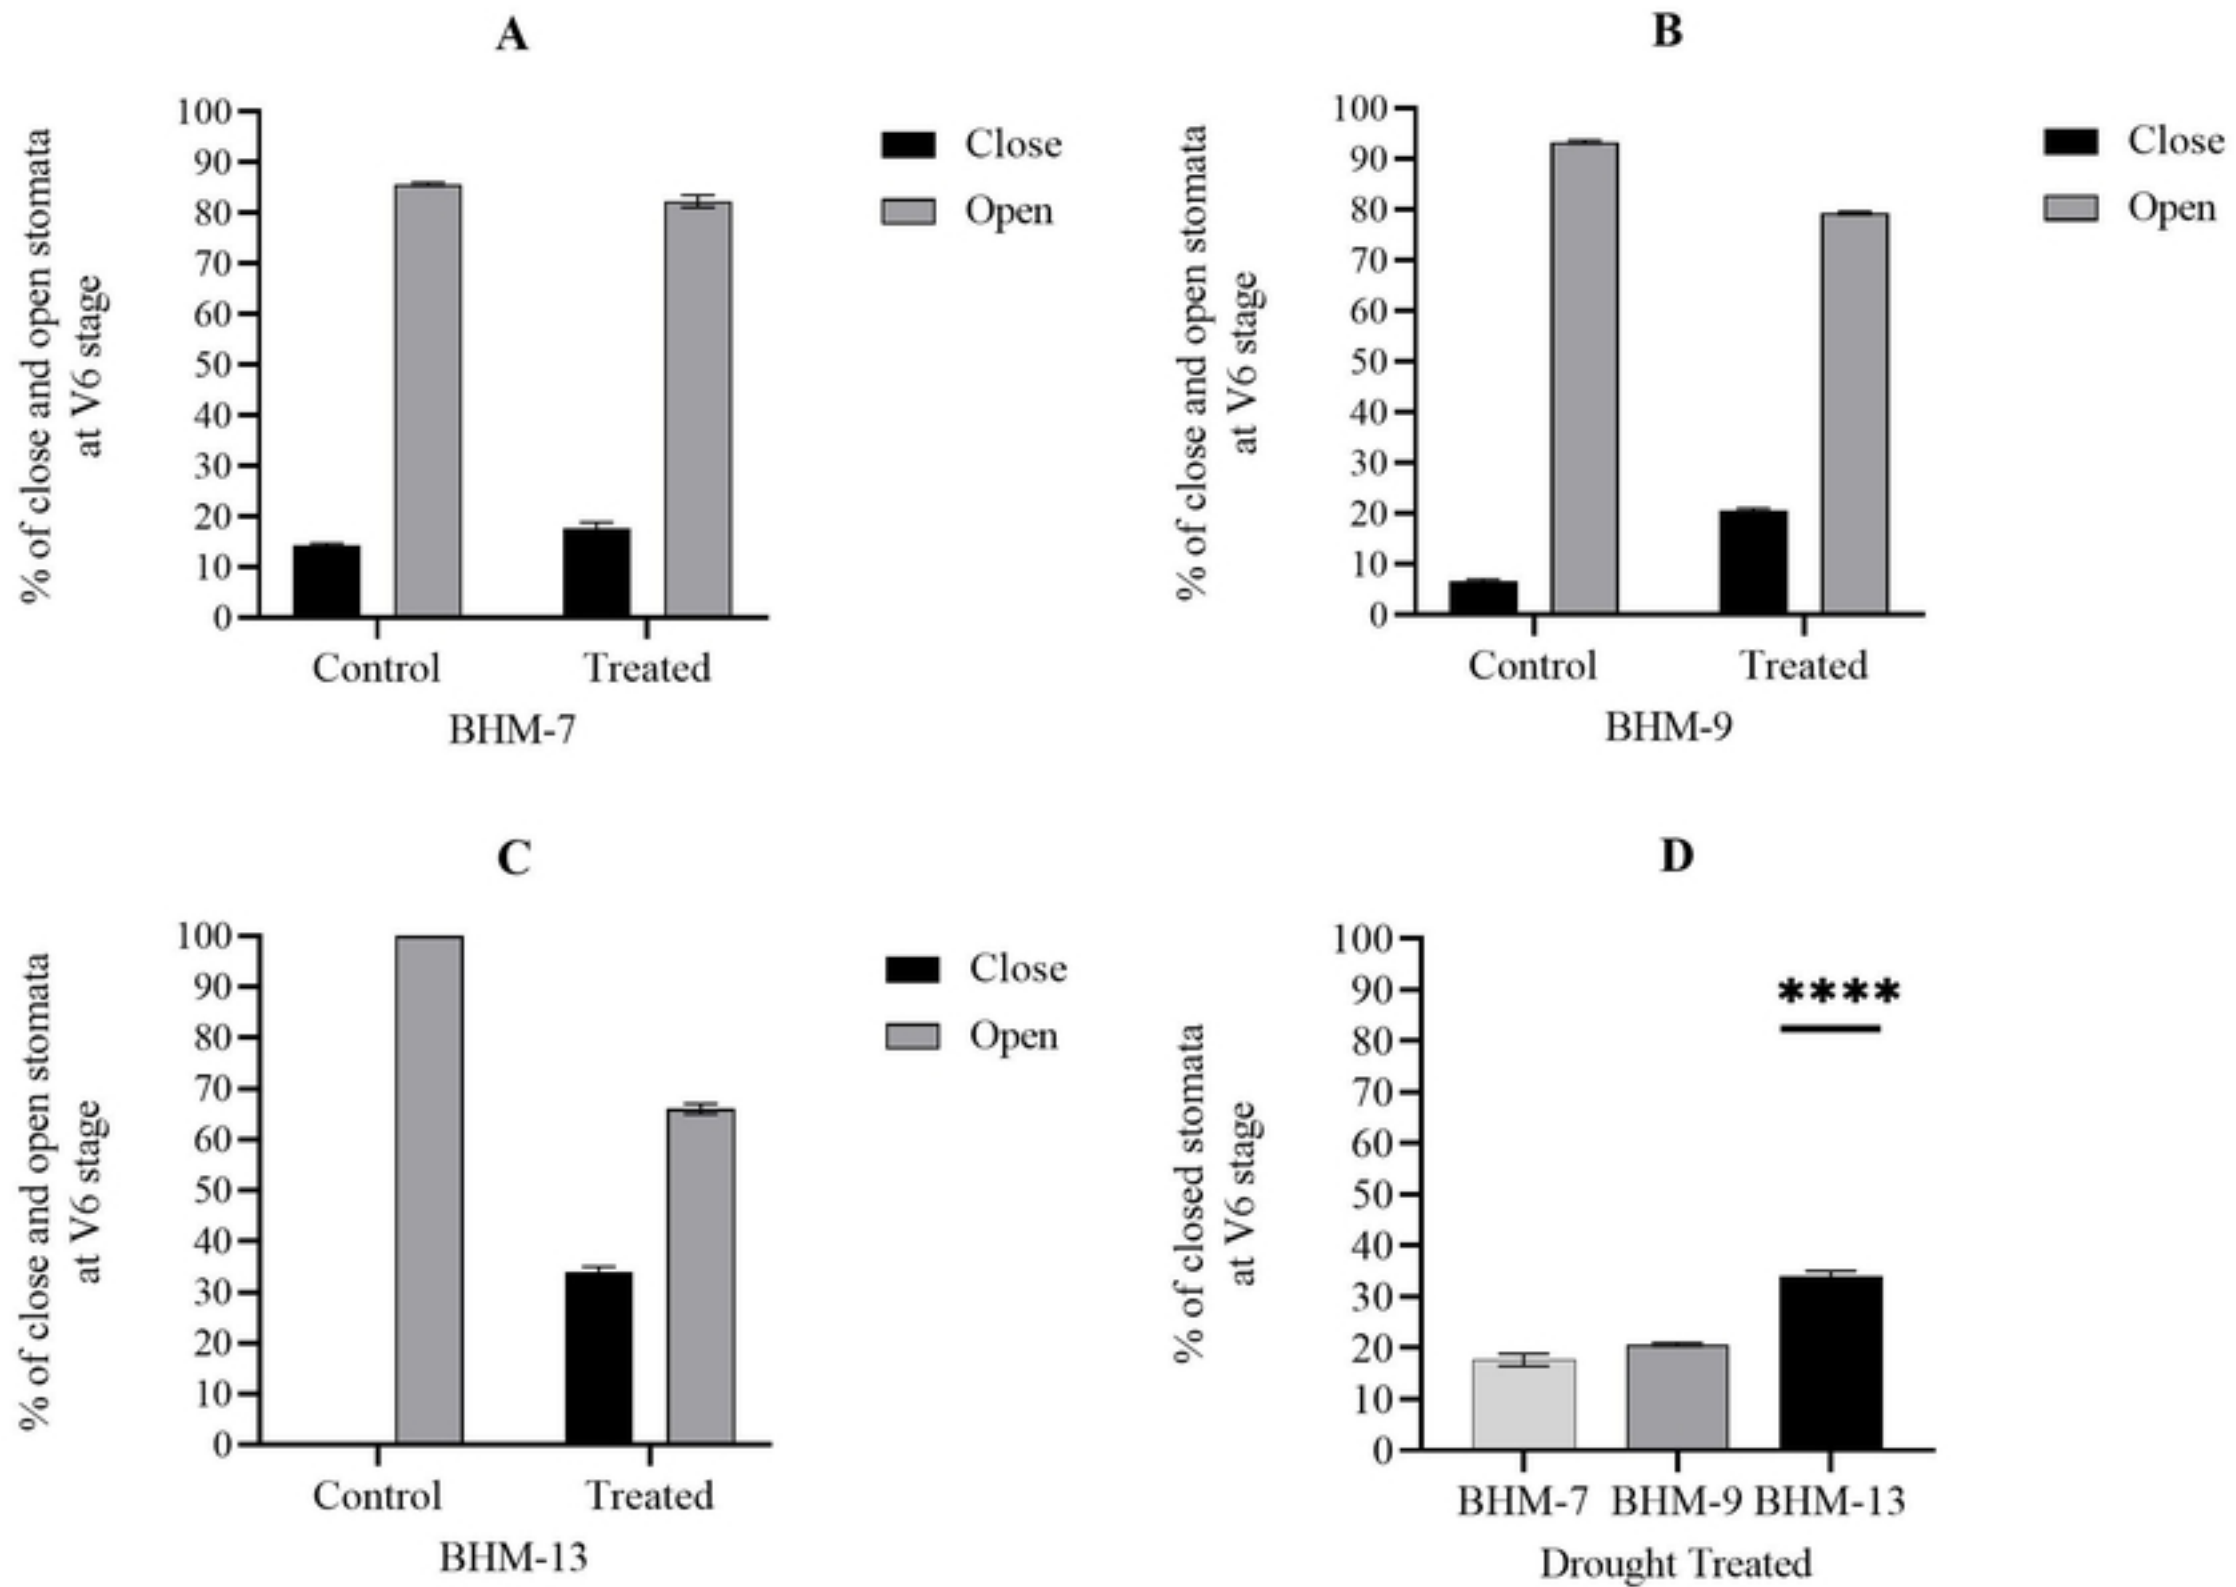

Figure 3

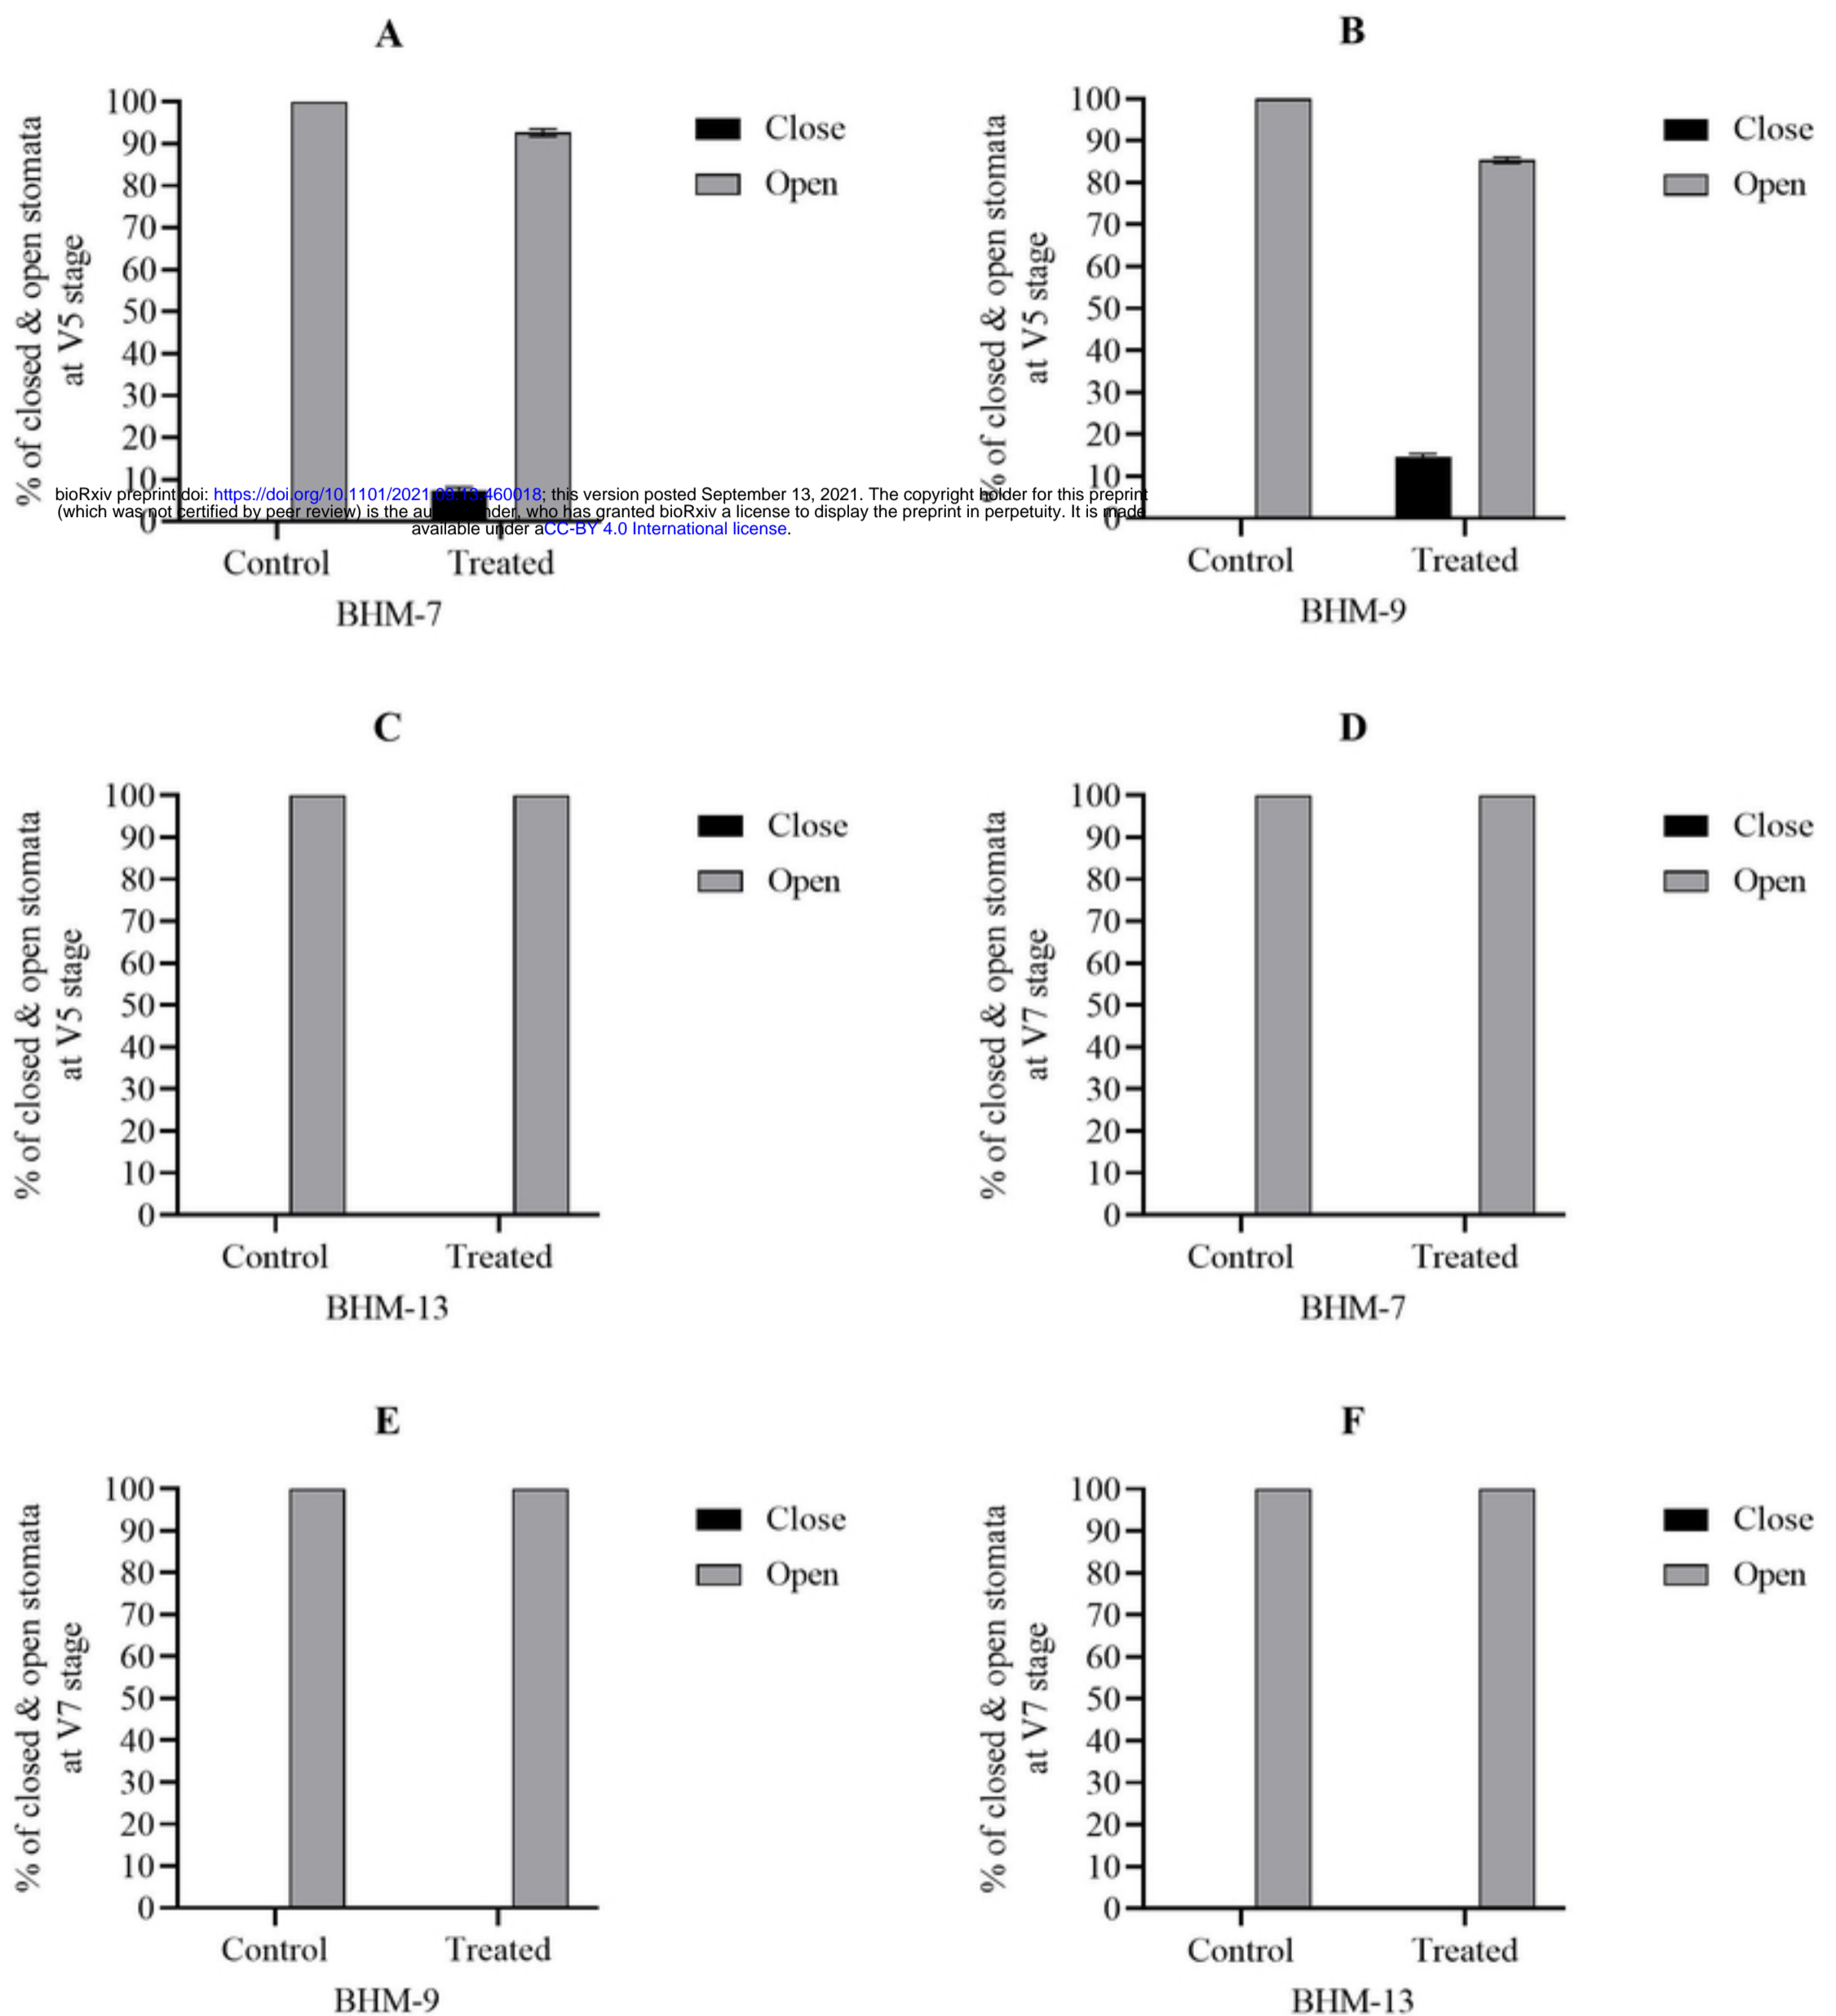

Figure 4



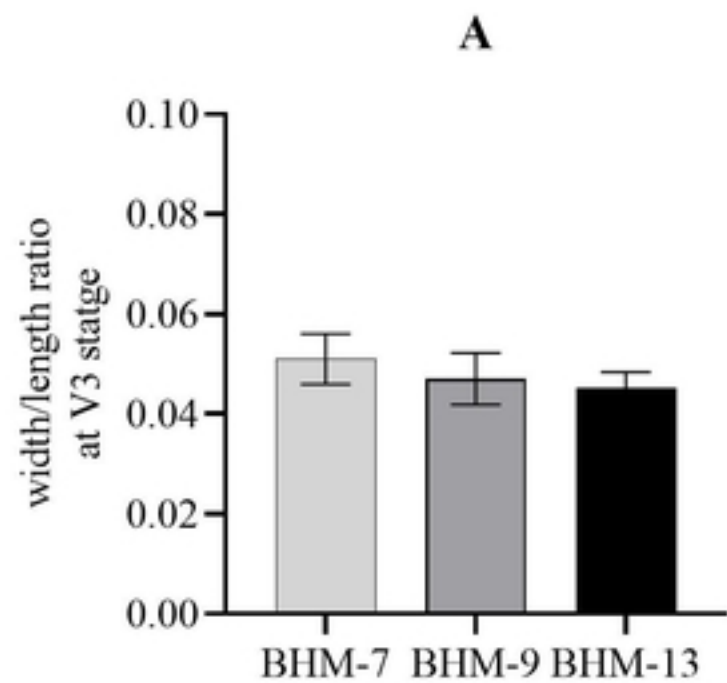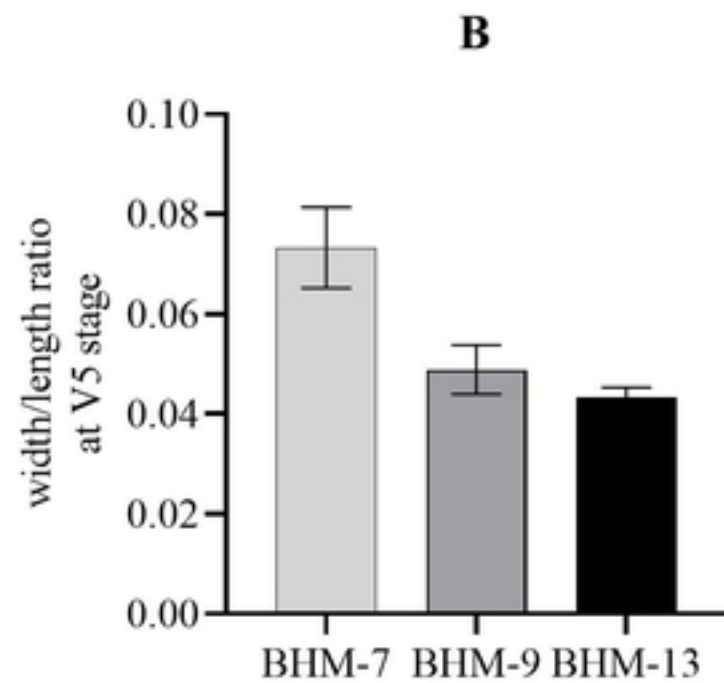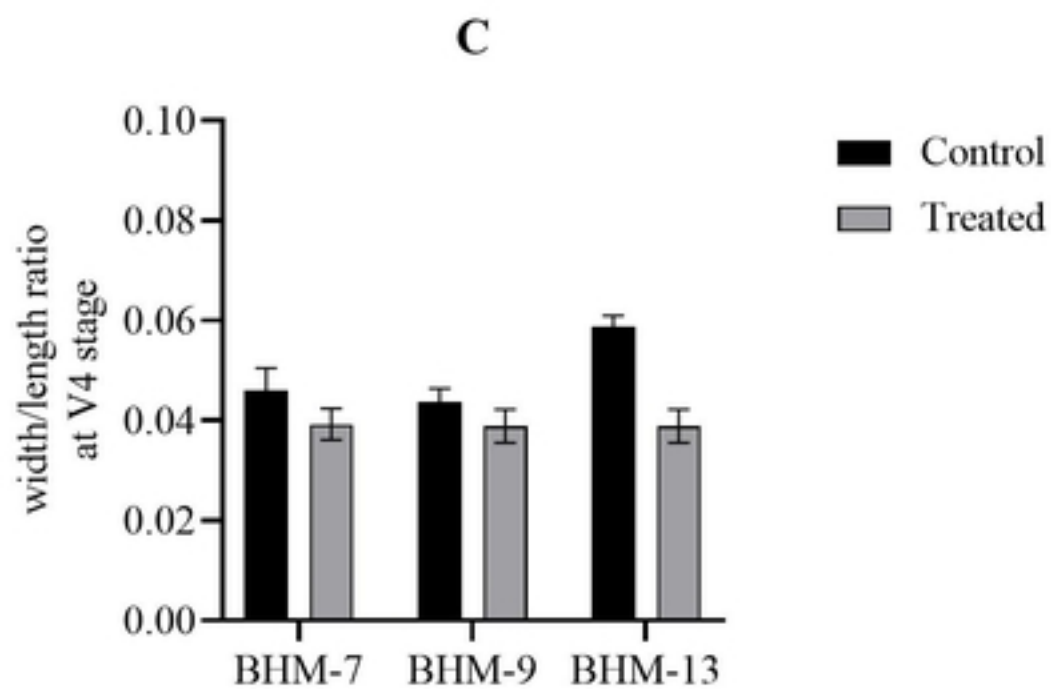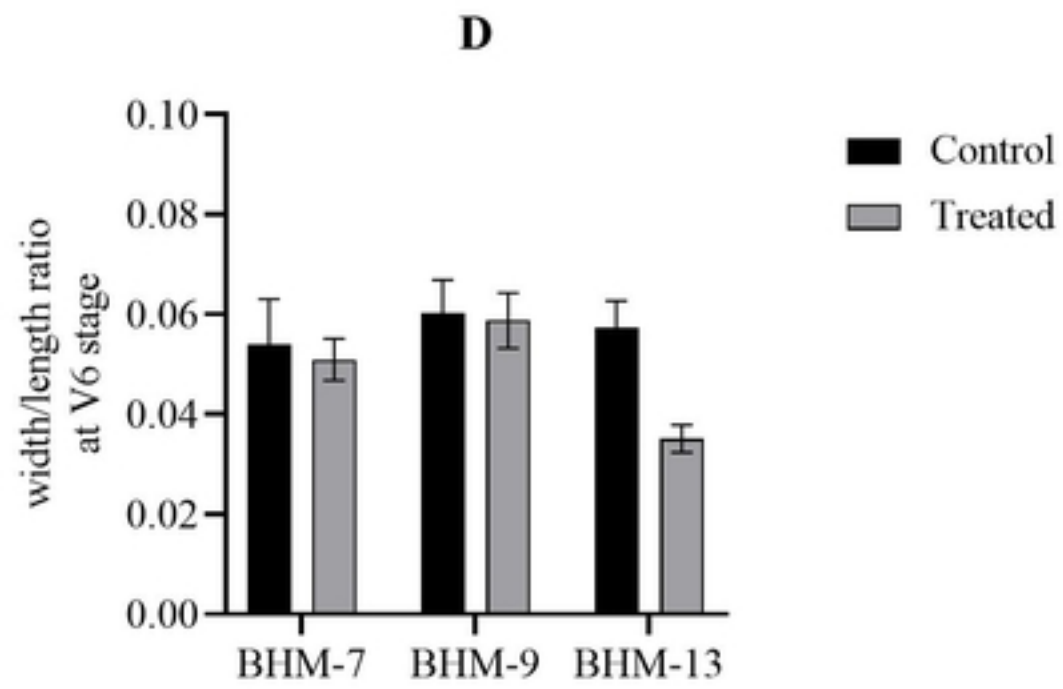

Figure 5

**A**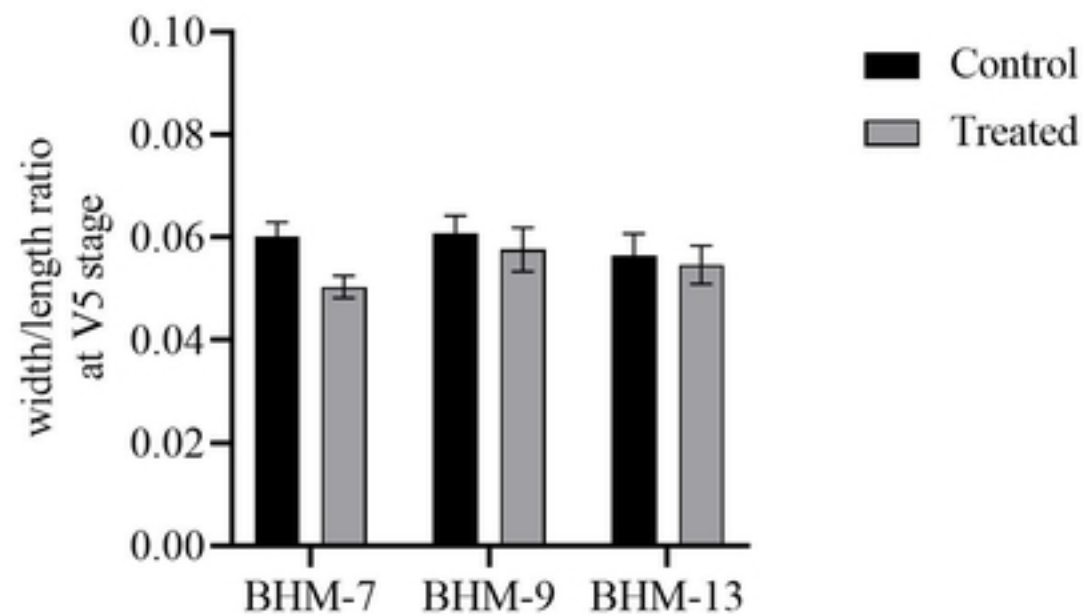**B**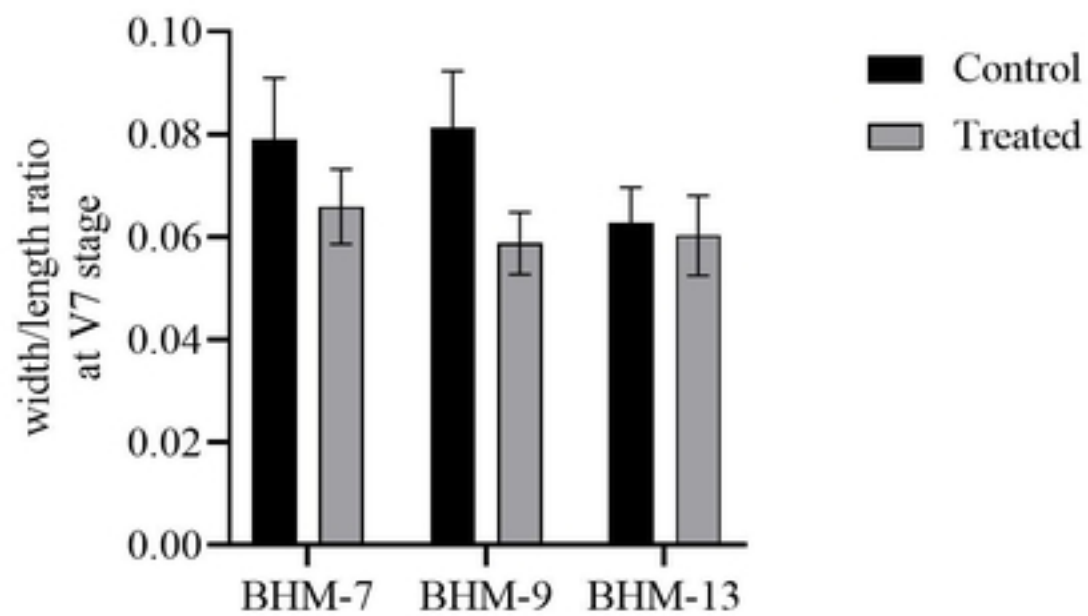

Figure 6
